# Supplementary material
Source: PubMed Central journal article supplement (PMC8152670)

## Supplemental Material

Figures S1a-S1h. Pattern match displays of importance of the factors relative to one another by sex. Younger players = U9-U13, older players = U14-U19. \*  $p \leq .001$ . Numbers in brackets represent the rank order of factors from most important [1] to least important [11].

Figure S1a

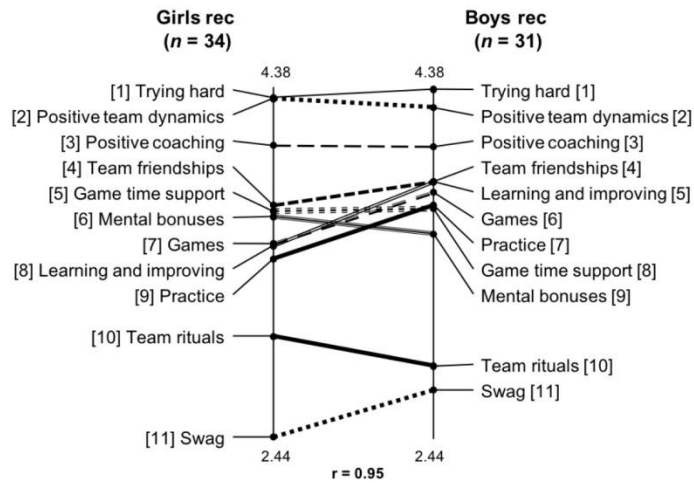

Figure S1b

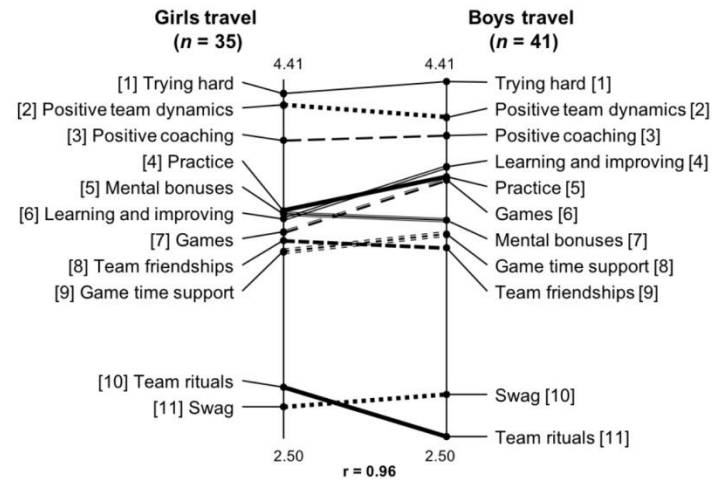

Figure S1c

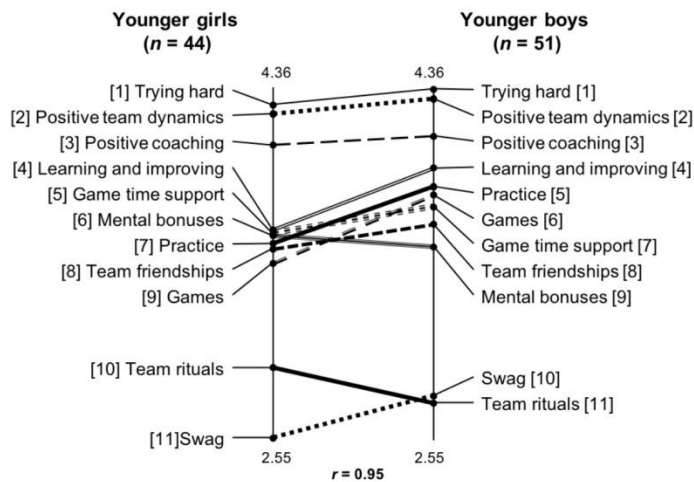

Figure S1d

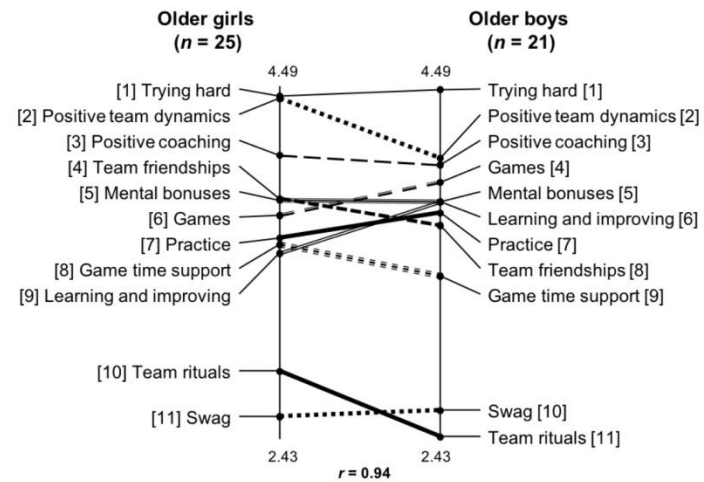

Figure S1e

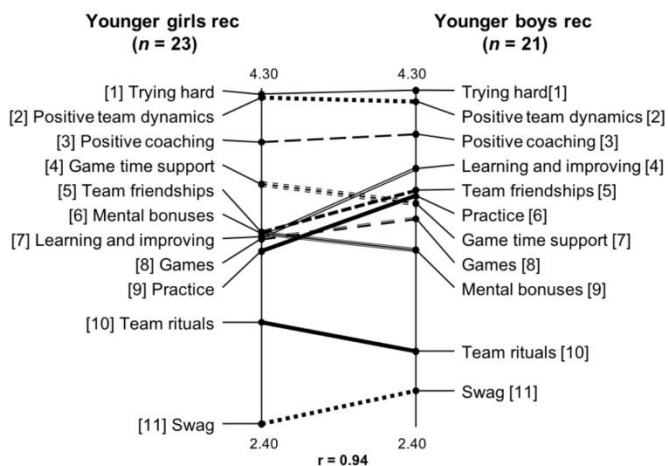

Figure S1f

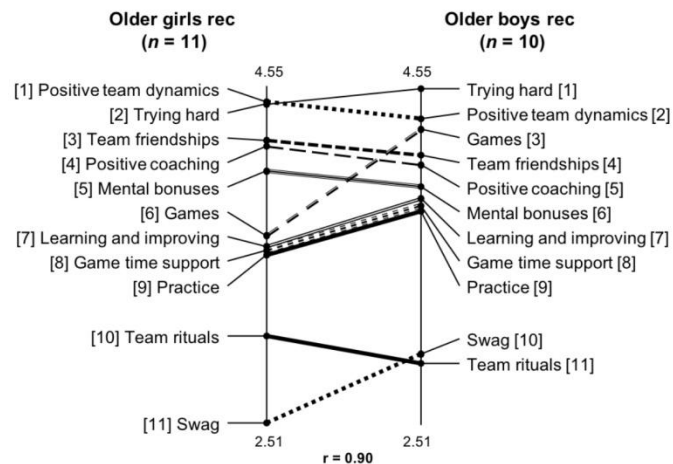

Figure S1g

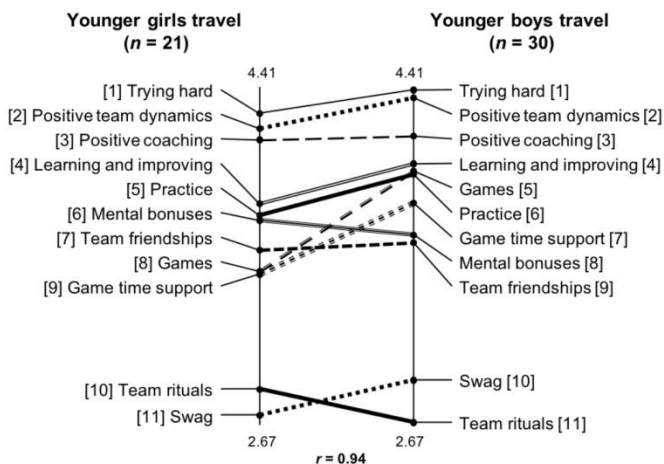

Figure S1h

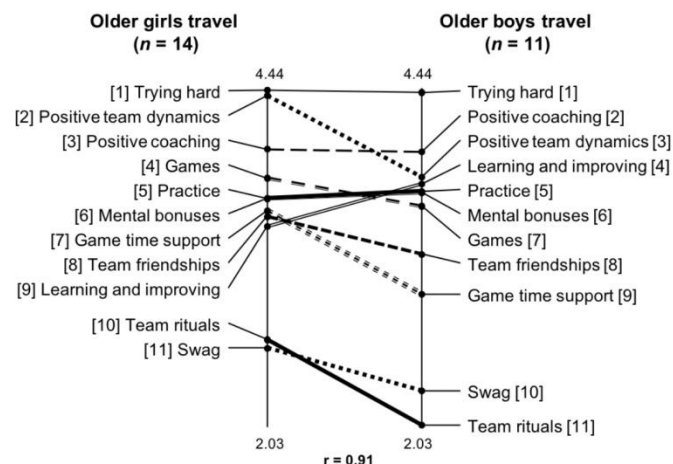

Figures S3a-S3h. Pattern match displays of importance of the fun factors relative to one another by age. Younger players = U9-U13, older players = U14-U19. \*  $p \leq .001$ . Numbers in brackets represent the rank order of factors from most important [1] to least important [11].

Figure S3a

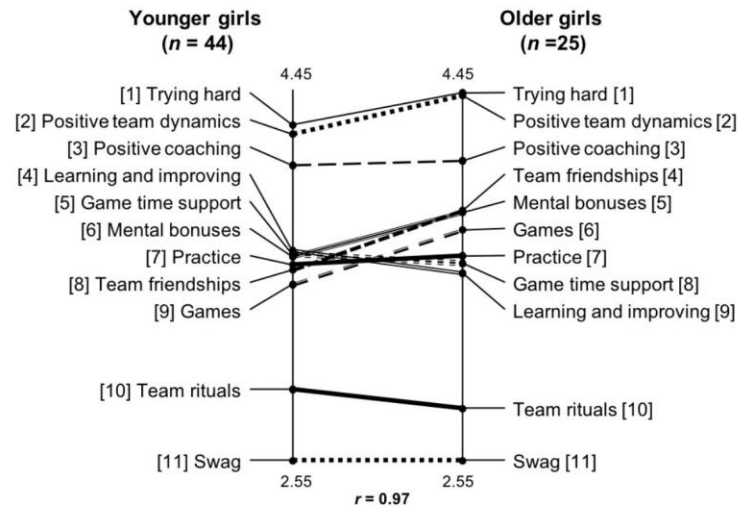

Figure S3b

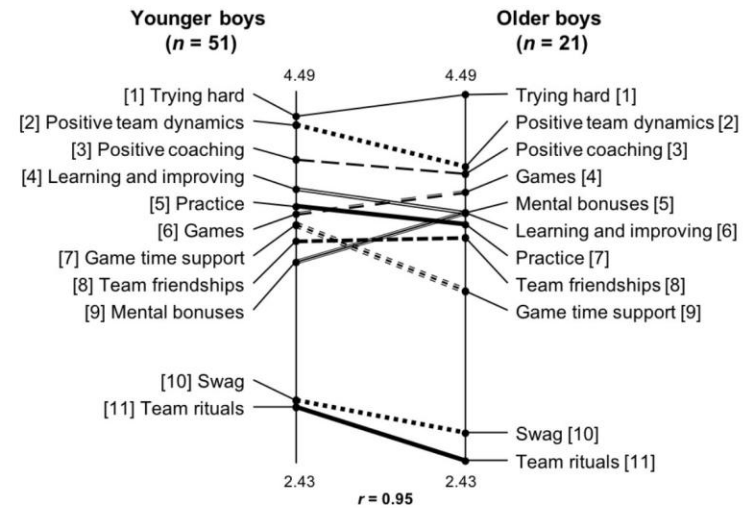

Figure S3c

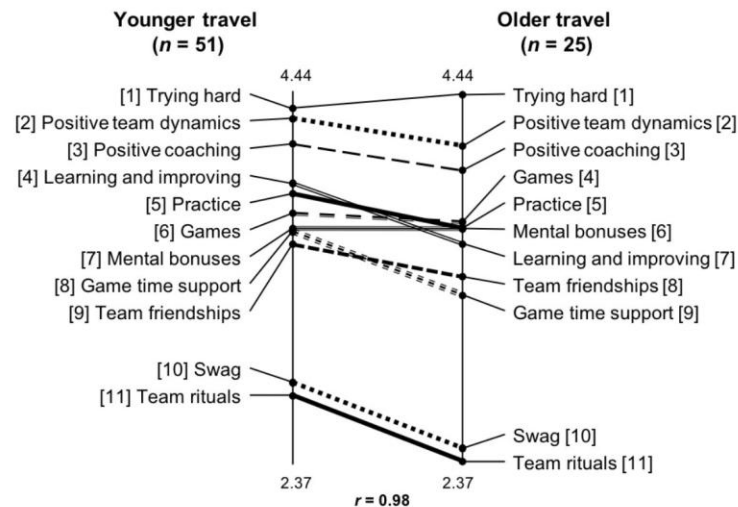

Figure S3d

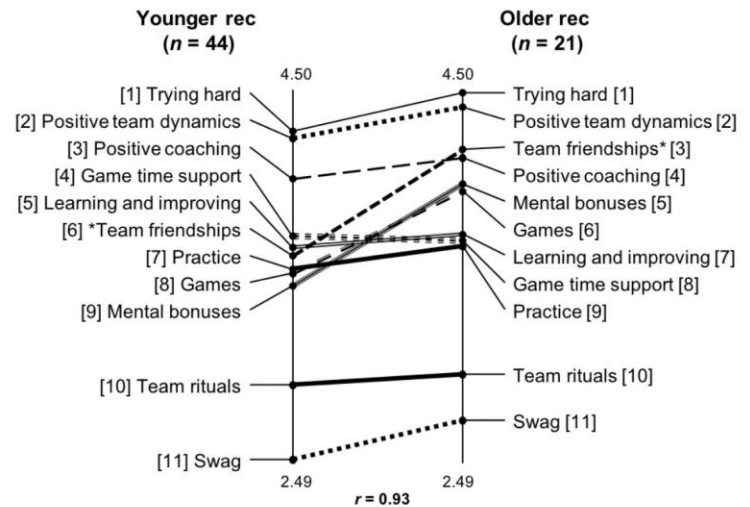

Figure S3e

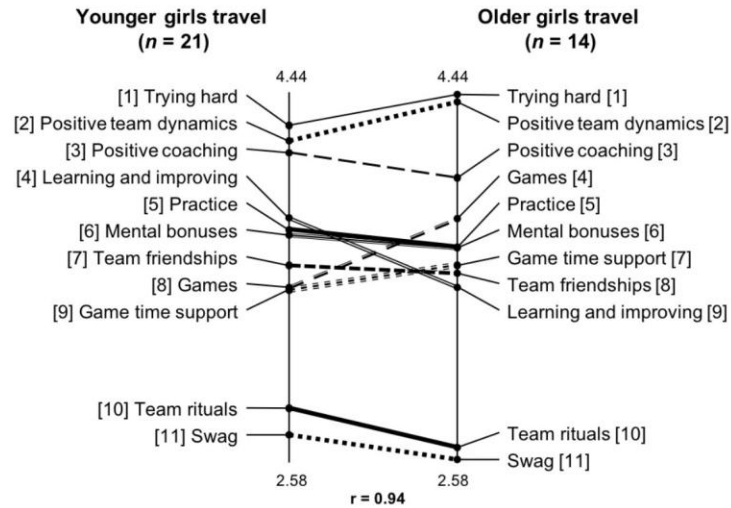

Figure S3f

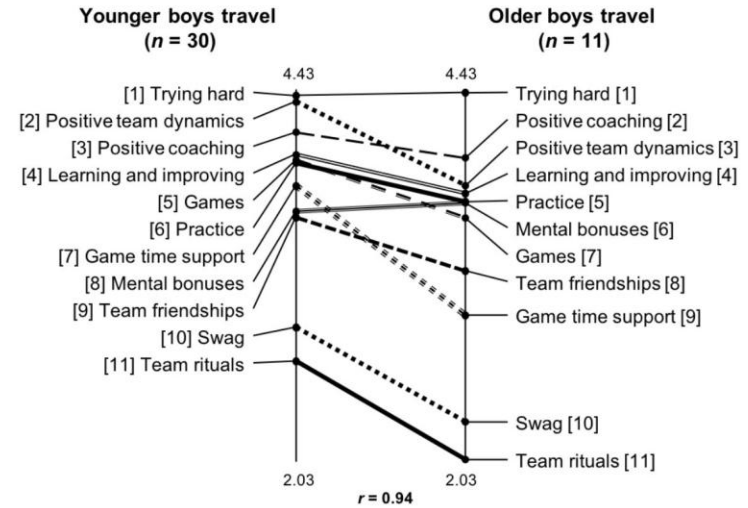

Figure S3g

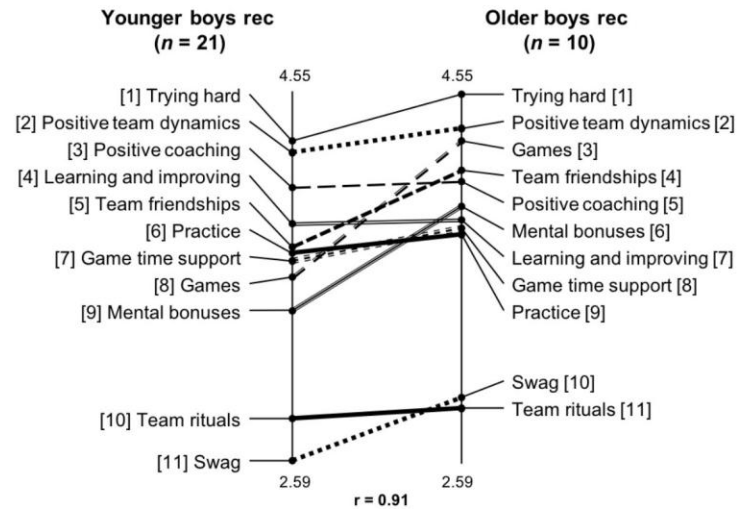

Figure S3h

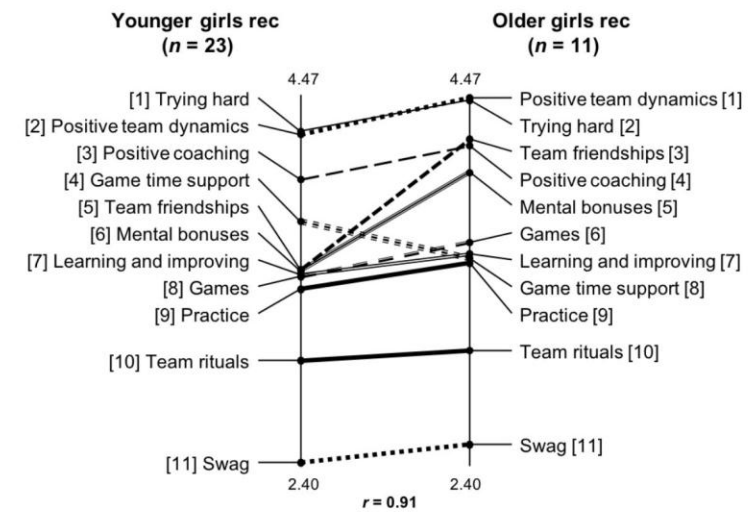

Figures S4a-S4h. Pattern match displays of importance of the fun factors relative to one another by sport program. Younger players = U9-U13, older players = U14-U19. \*  $p \leq .001$ . Numbers in brackets represent the rank order of factors from most important [1] to least important [11].

Figure S4a

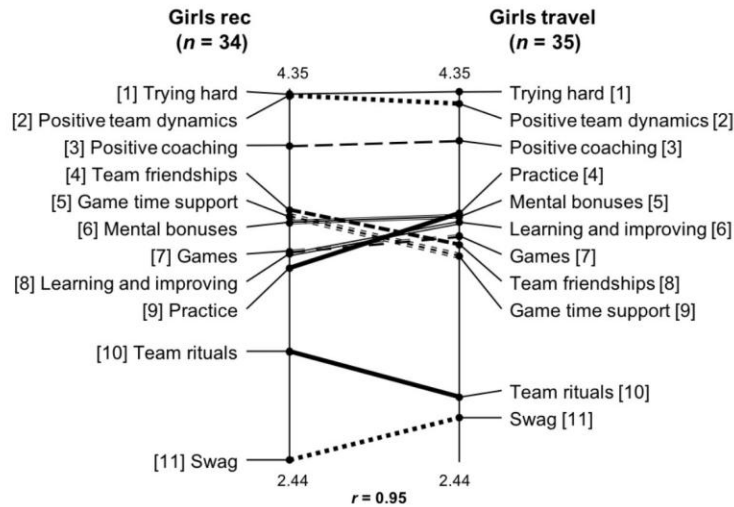

Figure S4b

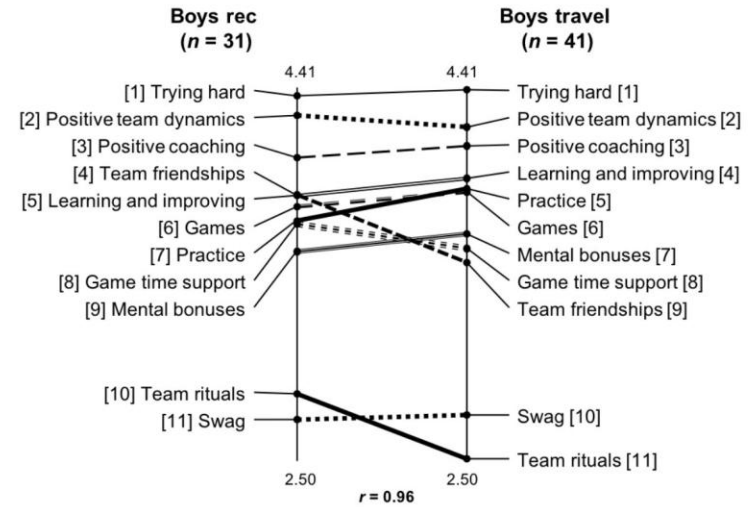

Figure S4c

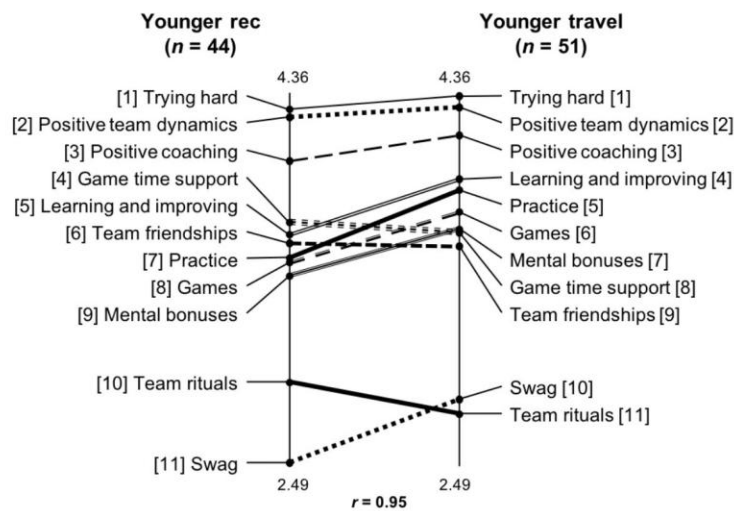

Figure S4d

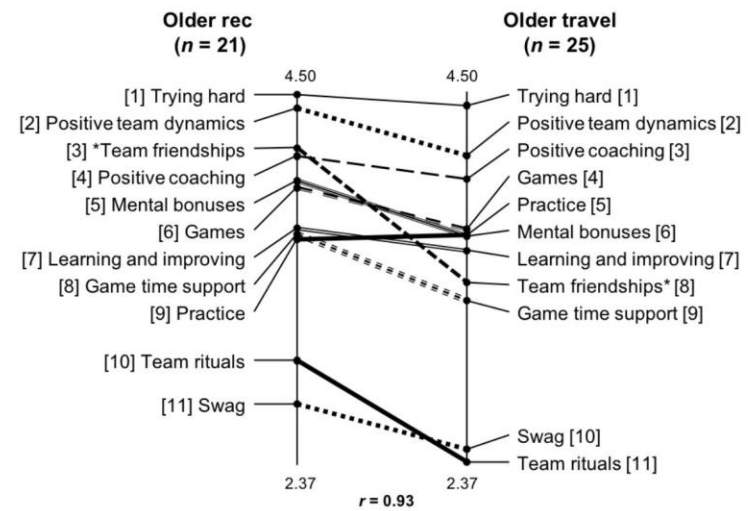

Figure S4e

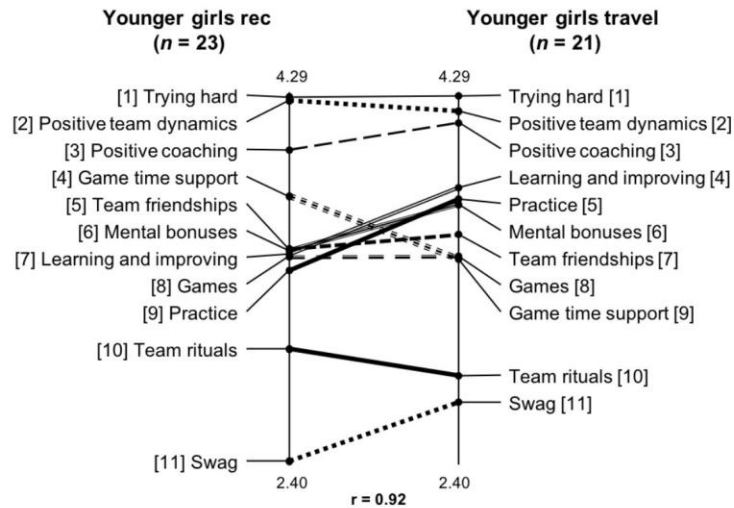

Figure S4f

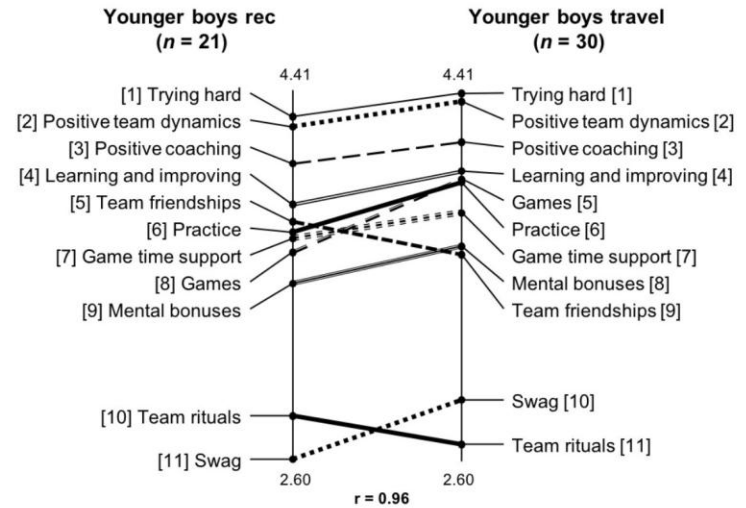

Figure S4g

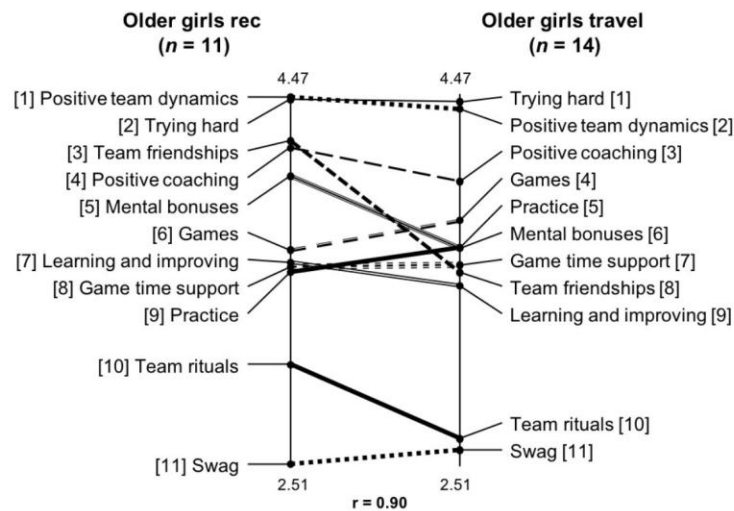

Figure S4h

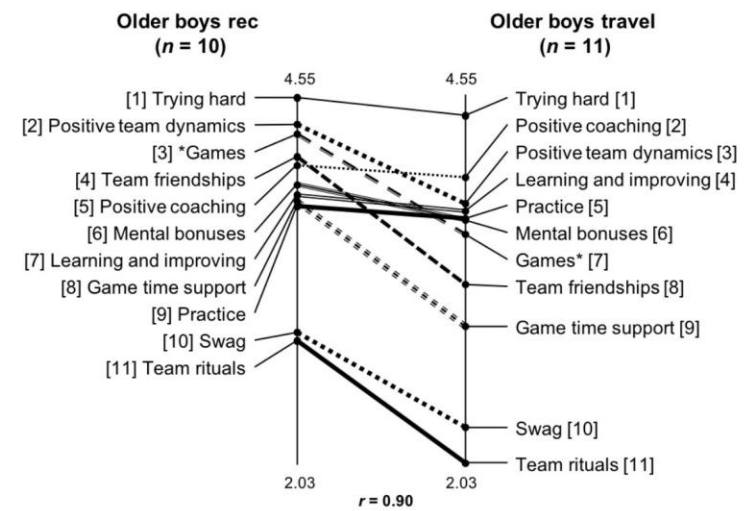

Supplement: NIHMS1059321-supplement-Pattern_match_figures.pdf [file NIHMS1059321-supplement-Pattern_match_figures.pdf]
